# Supplementary material for: Flexible and transparent nanohole-patterned films with antibacterial properties against Staphylococcus aureus
Source: Royal Society of Chemistry journal article supplement (doi:10.1039/d4tb00434e), 2024-01-01
Supplement: d4tb00434e1.pdf [file d4tb00434e1.pdf]

## Supporting information

### **Flexible and transparent nanohole-patterned film with antibacterial properties against *Staphylococcus aureus***

Hee-Kyeong Kim<sup>a†</sup>, Jeong-Hun Park<sup>a†</sup>, Min-Jun Jang<sup>a</sup>, Su-Ji Han<sup>a</sup>, Young-Sam Cho<sup>b,c\*</sup> and Hyun-Ha Park<sup>b,c\*</sup>

<sup>a</sup> Department of Mechanical Engineering, College of Engineering, Wonkwang University, 460 Iksandae-ro, Iksan, Jeonbuk 54538, Republic of Korea.

<sup>b</sup> Division of Mechanical Engineering, College of Engineering, Wonkwang University, 460 Iksandae-ro, Iksan, Jeonbuk 54538, Republic of Korea.

<sup>c</sup> MECHABIO Group, Wonkwang University, 460 Ikandae-ro, Iksan, Jeonbuk 54538, Republic of Korea.

## Table of contents

|                  |                                                                                                                                                                                                                                                                                                                        |     |
|------------------|------------------------------------------------------------------------------------------------------------------------------------------------------------------------------------------------------------------------------------------------------------------------------------------------------------------------|-----|
| <b>Table S1</b>  | Atomic composition of the N <sub>1s</sub> and P <sub>2p</sub> in the XPS results of “M-PUA bare” samples exposed in LB medium during 18 hr, 7 days, and 14 days.                                                                                                                                                       | S-3 |
| <b>Figure S1</b> | Cross-section view of the fabricated antibacterial film (total film thickness: approximately 118 μm, PET film: 100 μm, and PUA layer approximately 18 μm).                                                                                                                                                             | S-4 |
| <b>Figure S2</b> | Mechano-bactericidal and mechano-bacteriostatic evaluation of nanopillar (diameter: 500 nm and spacing: 300 nm) and nanohole (diameter: 1000 nm and spacing 500 nm) patterns against <i>S. aureus</i> . (a-i and b-i) Fluorescence image (green: live bacteria and red: dead bacteria) and (a-ii and b-ii) SEM images. | S-5 |
| <b>Figure S3</b> | Low magnification SEM images of <i>S. aureus</i> in nanohole film (“H_1,” diameter: 1000 nm and spacing: 500 nm). The red box is a magnified SEM image of the “H_1” film. The yellow arrow in the magnified “H_1” image shows the line for binary fission of <i>S. aureus</i> grown for 18 hr.                         | S-6 |
| <b>Figure S4</b> | XPS spectra of (a) non-MPC coated surface and (b) MPC coated surface.                                                                                                                                                                                                                                                  | S-7 |
| <b>Figure S5</b> | Evaluation of MPC-coated surface mechanical durability properties using adhesive taping test (ATT). (a) Water contact angle result, and (b) FT-IR spectrum.                                                                                                                                                            | S-8 |
| <b>Figure S6</b> | Evaluation of the chemical durability properties of MPC-coated surfaces exposed to LB medium for 18 hr, 7 days, and 14 days. (a) FT-IR spectrum and XPS results (b) N <sub>1s</sub> and (c) P <sub>2p</sub> ).                                                                                                         | S-9 |

**Table S1.** Atomic composition of the N<sub>1s</sub> and P<sub>2p</sub> in the XPS results of “M-PUA bare” samples exposed in LB medium during 18 hr, 7 days, and 14 days.

| Sample   | Atomic composition (%) |                 |
|----------|------------------------|-----------------|
|          | N <sub>1s</sub>        | P <sub>2p</sub> |
| 18 hours | 9.01                   | 1.12            |
| 7 days   | 8.81                   | 0.68            |
| 14 days  | 4.85                   | 0.64            |

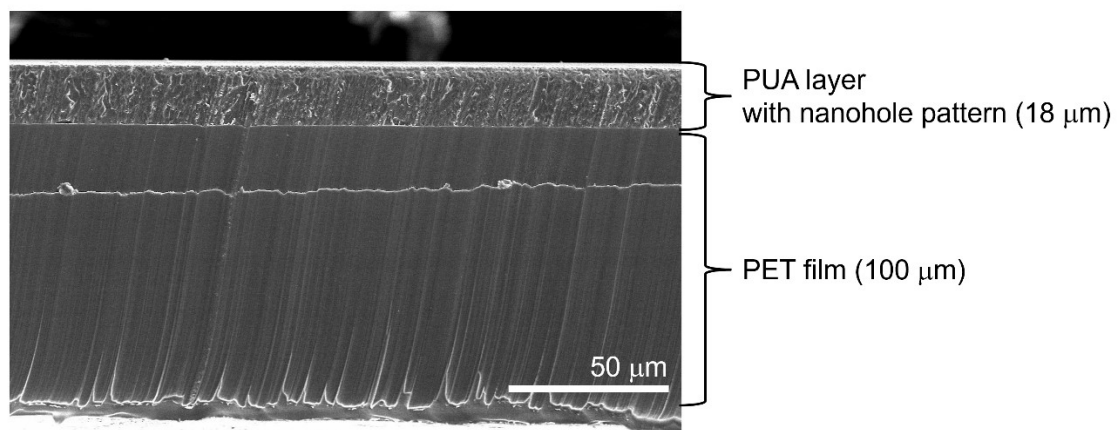

**Figure S1.** Cross-section view of the fabricated antibacterial film (total film thickness: approximately 118 μm, PET film: 100 μm, and PUA layer approximately 18 μm).

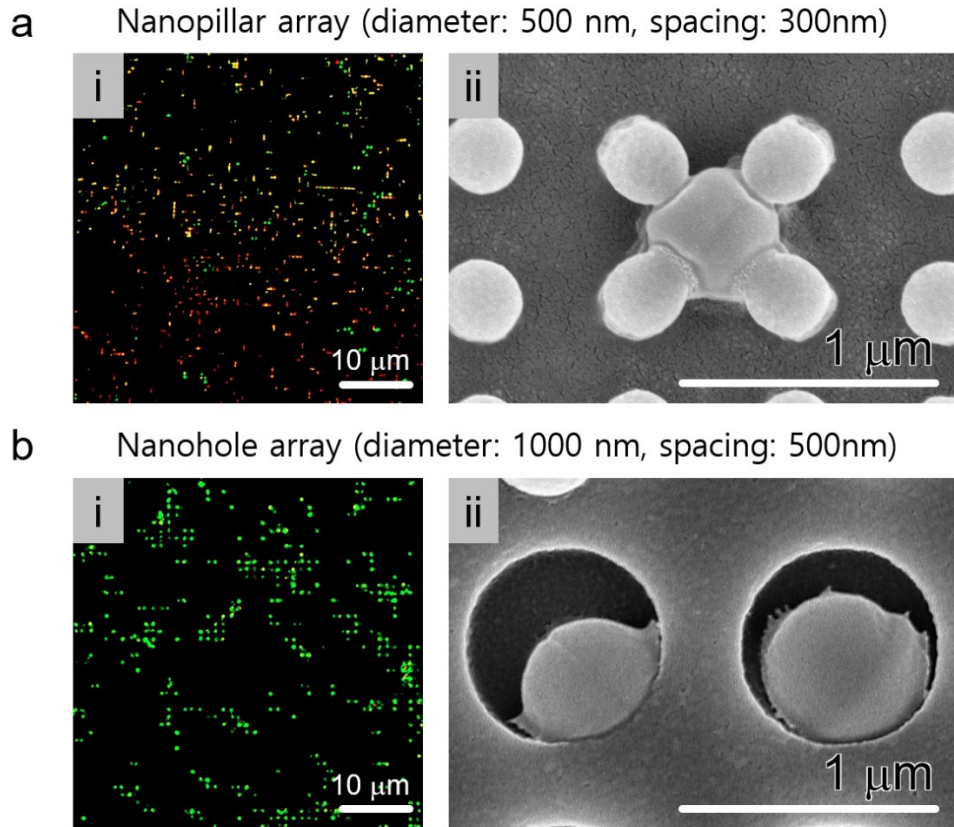

**Figure S2.** Mechano-bactericidal and mechano-bacteriostatic evaluation of nanopillar (diameter: 500 nm and spacing: 300 nm) and nanohole (diameter: 1000 nm and spacing 500 nm) patterns against *S. aureus*. (a-i and b-i) Fluorescence image (green: live bacteria and red: dead bacteria) and (a-ii and b-ii) SEM images.

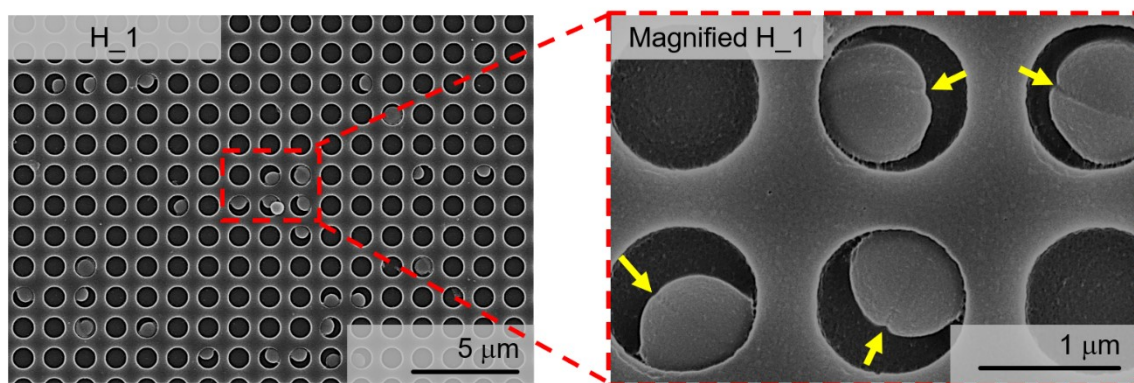

**Figure S3.** Low magnification SEM images of *S. aureus* in nanohole film (“H\_1,” diameter: 1000 nm and spacing: 500 nm). The red box is a magnified SEM image of the “H\_1” film. The yellow arrow in the magnified “H\_1” image shows the line for binary fission of *S. aureus* grown for 18 hr.

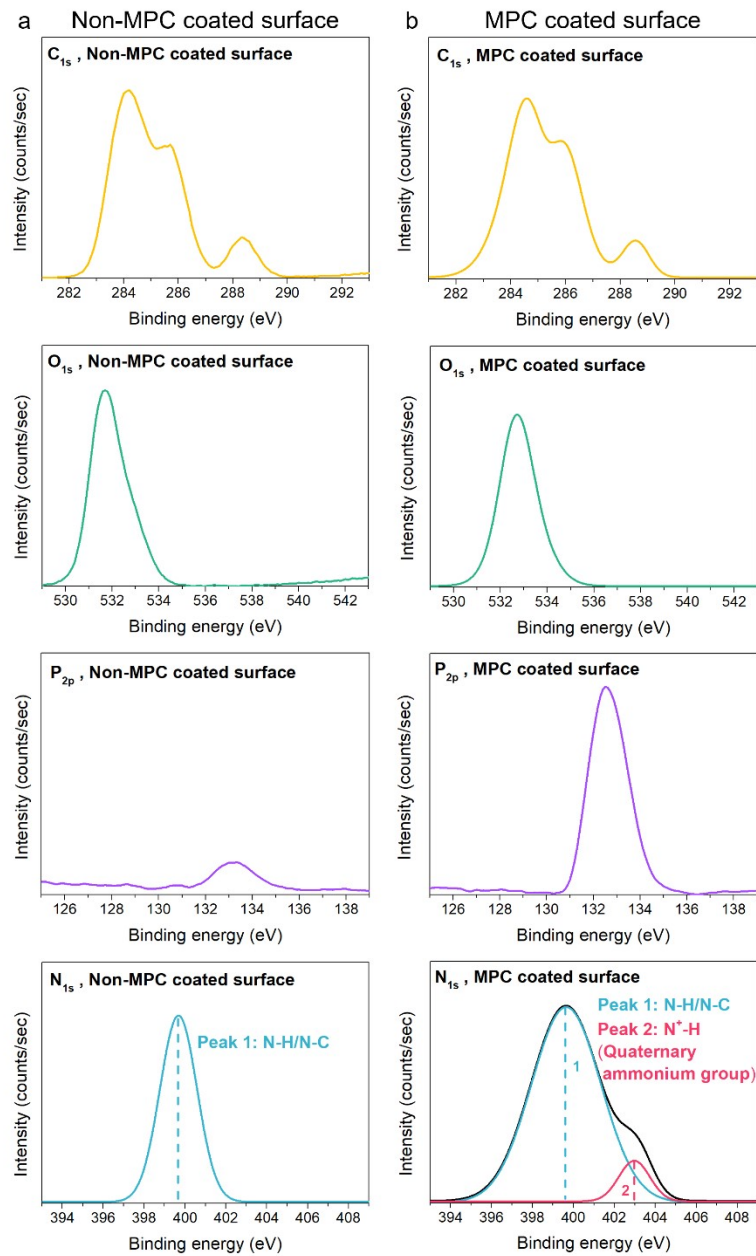

**Figure S4.** XPS spectra of (a) non-MPC coated surface and (b) MPC coated surface.

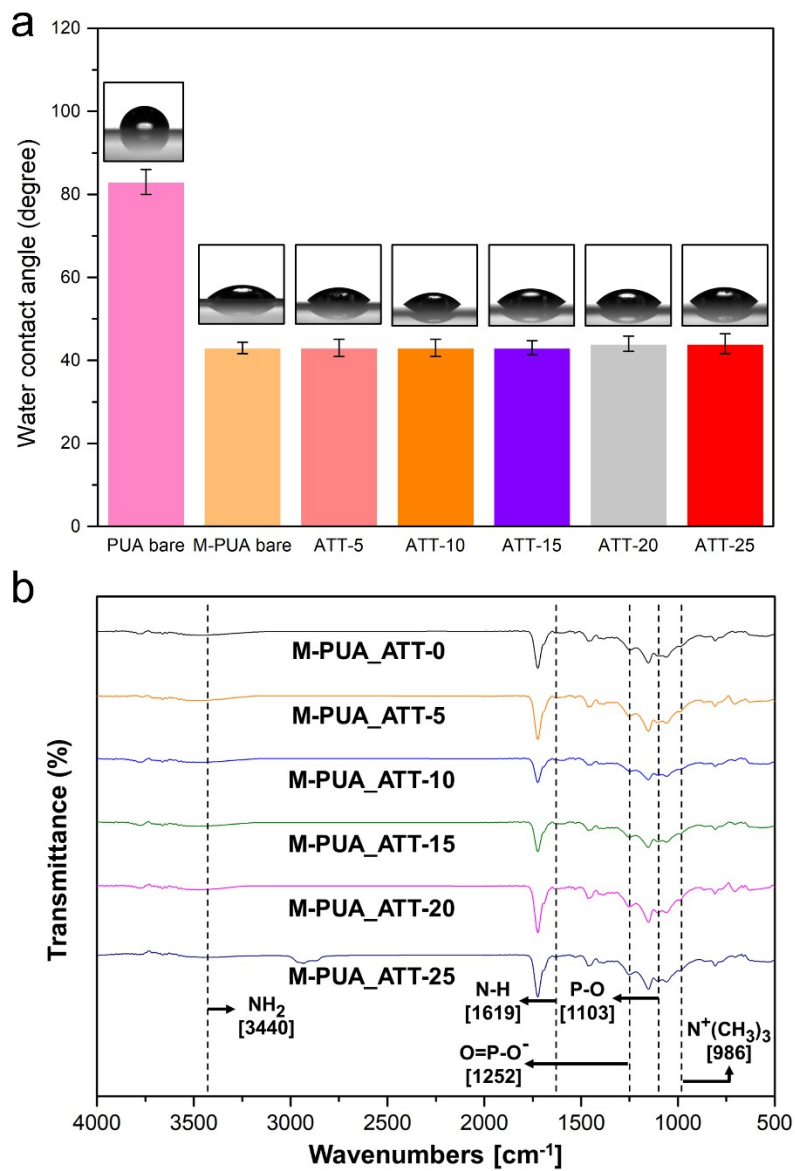

**Figure S5.** Evaluation of MPC-coated surface mechanical durability properties using adhesive taping test (ATT). (a) Water contact angle result, and (b) FT-IR spectrum.



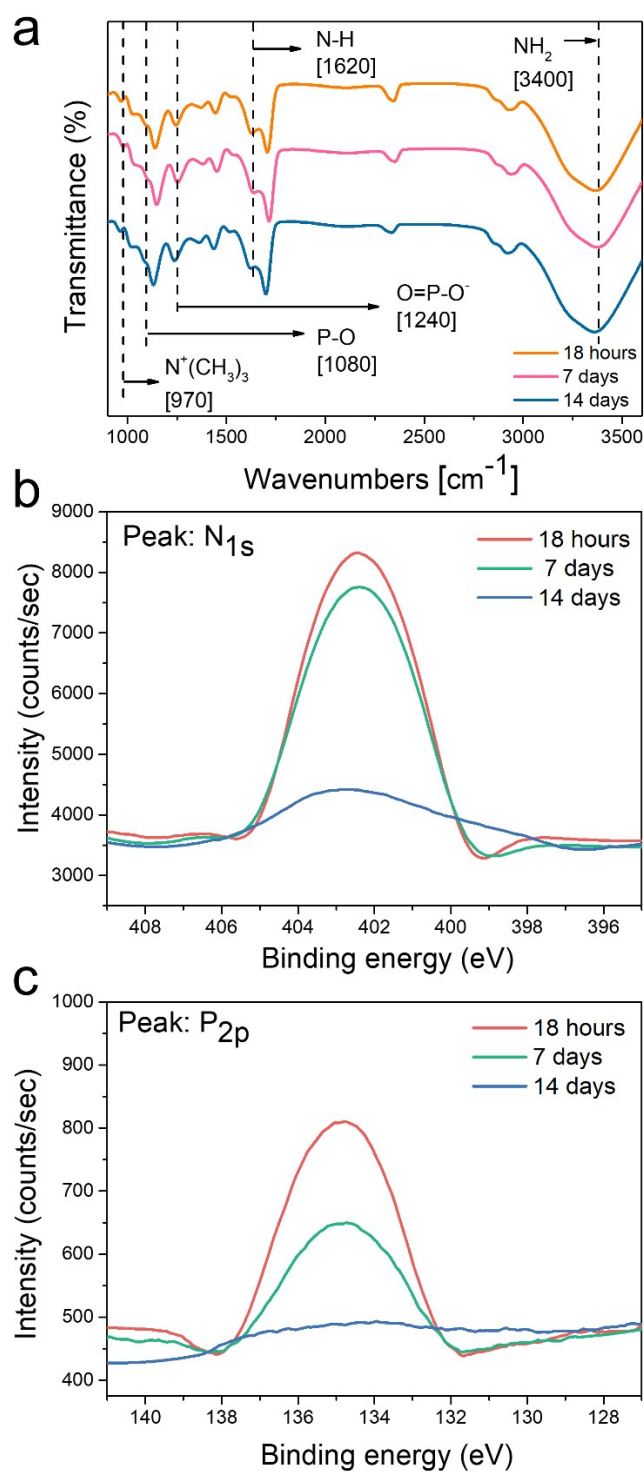

**Figure S6.** Evaluation of the chemical durability properties of MPC-coated surfaces exposed to LB medium for 18 hr, 7 days, and 14 days. (a) FT-IR spectrum and XPS results (b) N<sub>1s</sub> and (c) P<sub>2p</sub>).
